# Supplementary material for: Anticancer Effects of Salvia miltiorrhiza Alcohol Extract on Oral Squamous Carcinoma Cells
Source: Hindawi journal article supplement (doi:10.1155/2017/5364010), 2017-01-01
Supplement: f1 [file 5364010.f1.pdf]

**Anti-cancer Effects of *Salvia miltiorrhiza* Alcohol Extract on  
Oral Squamous Carcinoma Cells**

***Supplementary Information***

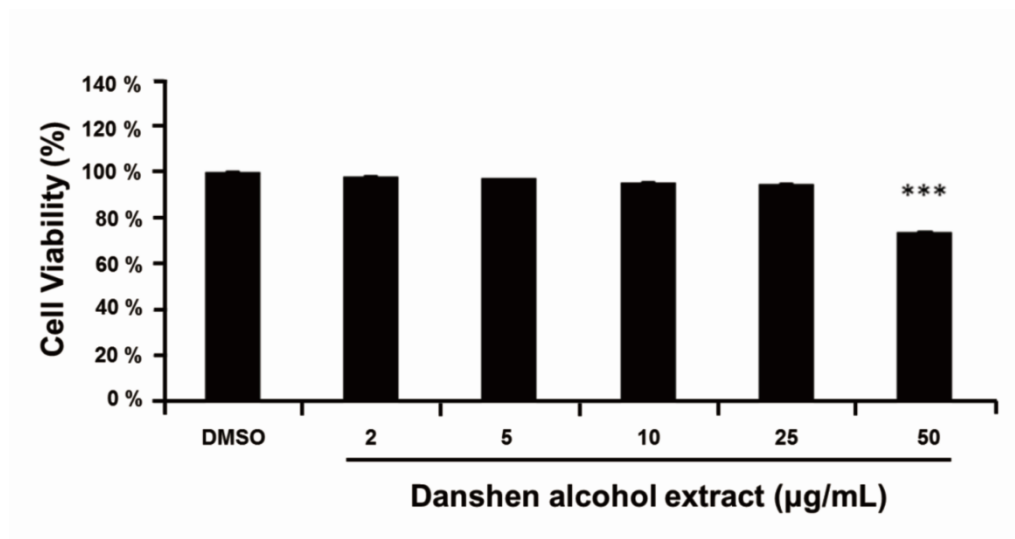

**Supplementary Figure S1.** NOK cell viability following treatment with Danshen alcohol extract. Cells were treated with concentrations of 0, 2, 5, 10, 25 or 50 µg/ml of Danshen alcohol extract for 24 hrs. MTT assay results are expressed as mean  $\pm$  SEM (n=4). \*\*\* $p$  < 0.001.

**Table S1. Quantitative HPLC data for two major components in extracts from China- and Taiwan-grown Danshen plants.**

| Sample | Salvianolic acid B (mg/g) | Tanshinone IIA (mg/g) |
|--------|---------------------------|-----------------------|
| CD1    | 86.05                     | 3.42                  |
| CD2    | 101.07                    | 3.04                  |
| CD3    | 85.60                     | 0.08                  |
| TD1    | 121.82                    | 4.94                  |
| TD2    | 100.46                    | 3.44                  |
| TD3    | 95.10                     | 0.02                  |

CD: China Danshen; TD: Taiwan Danshen.

CD1 and TD1: 95% ethanol extract; CD2 and TD2: 1:1 water/ethanol extract; CD3 and TD3: water extract.

**Table S2. DPPH radical scavenging data for extracts from China- and Taiwan-grown Danshen plants.**

| Sample | Scavenging Rate (%) |              |              |              | SC <sub>50</sub> |
|--------|---------------------|--------------|--------------|--------------|------------------|
|        | 0.08 (mg/mL)        | 0.1 (mg/mL)  | 0.2 (mg/mL)  | 0.4 (mg/mL)  |                  |
| CD1    |                     | 30.57 ± 4.56 | 49.62 ± 3.03 | 66.61 ± 2.40 | 0.331            |
| CD2    | 26.68 ± 0.97        | 34.17 ± 4.21 | 55.17 ± 8.52 |              | 0.198            |
| CD3    | 29.60 ± 4.04        | 38.47 ± 5.94 | 64.58 ± 8.60 |              | 0.132            |
| TD1    | 42.00 ± 0.70        | 54.55 ± 1.38 | 71.20 ± 4.27 |              | 0.094            |
| TD2    |                     | 24.66 ± 4.44 | 38.90 ± 2.92 | 59.90 ± 0.99 | 0.311            |
| TD3    |                     | 32.28 ± 3.74 | 45.33 ± 5.16 | 63.99 ± 3.11 | 0.260            |
|        | 10                  | 20           | 40           |              | SC <sub>50</sub> |
| Trolox | 25.39 ± 0.35        | 44.13 ± 1.96 | 91.35 ± 0.80 |              | 0.022            |

Note: Trolox served as a positive control.

CD: China Danshen; TD: Taiwan Danshen.

CD1 and TD1: 95% ethanol extract; CD2 and TD2: 1:1 water/ethanol extract; CD3 and TD3: water extract.

**Table S3: ABTS radical cation-scavenging activity in different extracts from China or Taiwan Danshen.**

| Sample | Scavenging Rate (%) |              |              |              | SC <sub>50</sub> |
|--------|---------------------|--------------|--------------|--------------|------------------|
|        | 0.08 (mg/mL)        | 0.1 (mg/mL)  | 0.2 (mg/mL)  | 0.4 (mg/mL)  |                  |
| CD1    |                     | 26.35 ± 2.12 | 45.40 ± 2.83 | 62.61 ± 0.35 | 0.284            |
| CD2    |                     | 25.85 ± 0.75 | 46.66 ± 0.61 | 73.77 ± 0.71 | 0.248            |
| CD3    |                     | 26.86 ± 0.30 | 47.58 ± 1.93 | 81.31 ± 0.61 | 0.228            |
| TD1    |                     | 34.58 ± 1.89 | 55.70 ± 0.76 | 97.93 ± 0.11 | 0.197            |
| TD2    |                     | 21.51 ± 1.85 | 49.85 ± 1.85 | 87.78 ± 3.09 | 0.232            |
| TD3    |                     | 37.16 ± 2.91 | 47.82 ± 2.01 | 88.02 ± 2.49 | 0.223            |
|        | 20                  | 40           | 50           | 80           | SC <sub>50</sub> |
| Trolox | 20.80± 0.87         | 47.60± 0.90  | 53.97± 1.02  | 94.25± 0.83  | 0.048            |

Note: Trolox served as a positive control.

CD: China Danshen; TD: Taiwan Danshen.

CD1 and TD1: 95% ethanol extract; CD2 and TD2: 1:1 water/ethanol extract; CD3 and TD3: water extract.
